# Supplementary material
Source: PubMed Central journal article supplement (PMC3691355)
Supplement: NIHMS478827-supplement-1.pdf [file NIHMS478827-supplement-1.pdf]

# Figure S1

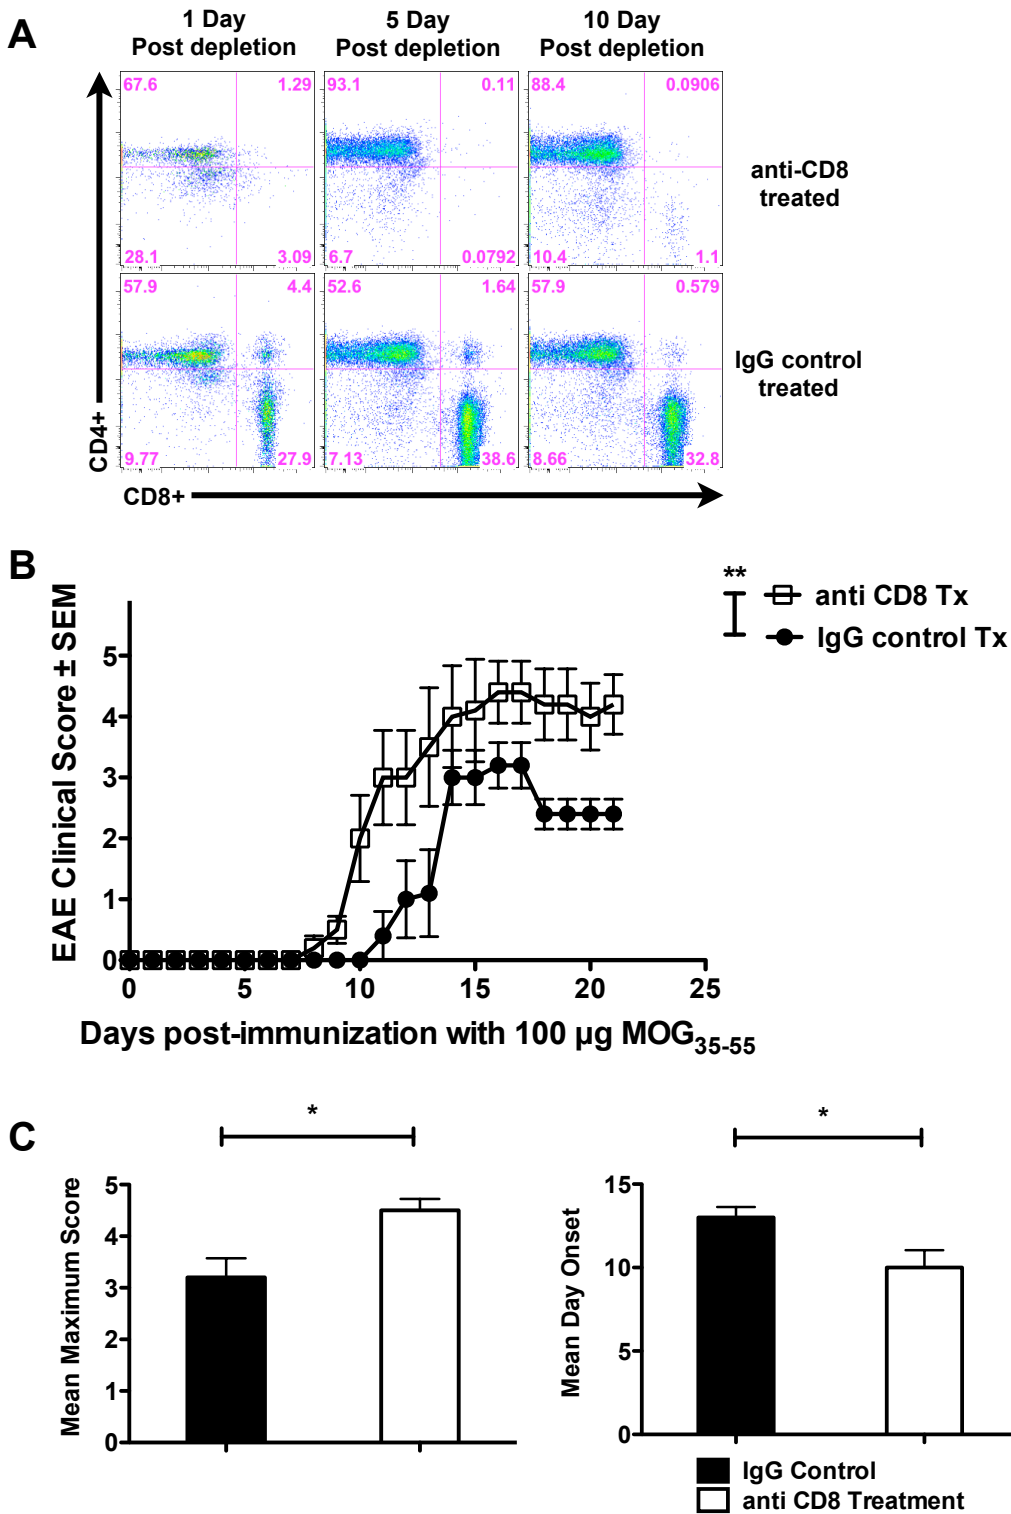

**Figure S1. Increase of EAE severity in antibody-mediated CD8 depleted mice.** (A) Flow cytometric data showing the successful depletion of CD8 T-cells from the peripheral immune compartment. (B) Clinical disease severity comparison between anti-CD8 depleted versus IgG control treated mice, post EAE induction. (C) Mean maximum EAE score and mean day of onset of CD8-depleted (vs. control) WT mice. \* $p < 0.05$ . Representative data from three independent experiments (5-7 mice per condition).

## Figure S2

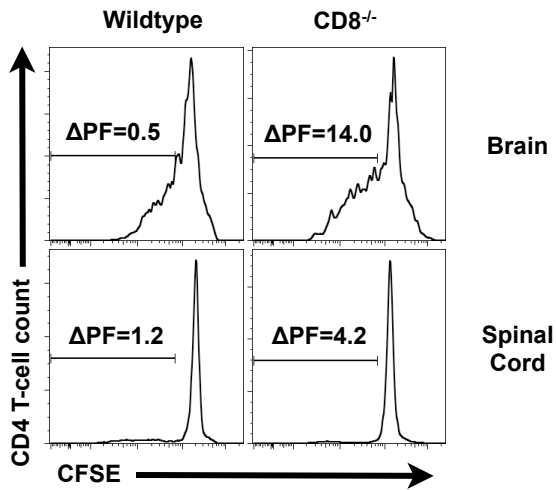

**Figure S2. Augmented CNS-specific CD4 T-cells autoreactivity within the CNS of CD8<sup>-/-</sup> mice.** CFSE-based proliferation assays were performed on cells isolated from brain and spinal cord of CD8<sup>-/-</sup> and WT mice at day 20 post-immunization. CFSE histograms are shown.  $\Delta$ PF represents difference between proliferation in the presence of cognate antigen minus background. Representative of two independent experiments (n=10 per condition).

# Figure S3

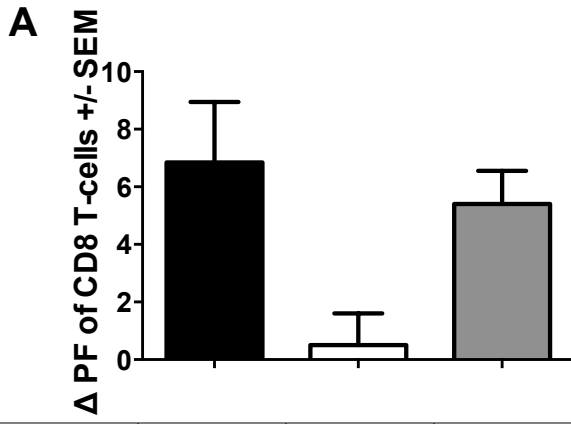

| T-cell   | MOG-CD8 | MOG-CD8             | MOG-CD8             |
|----------|---------|---------------------|---------------------|
| APC      | WT      | KbDb <sup>-/-</sup> | WT                  |
| Antibody | -       | -                   | α-Qa-1 <sup>b</sup> |

**Figure S3. Autoregulatory CD8 T-cell are ineffective in the absence of MHC Ia.** (A) Dependence of MHC I for CD8 T-cell activation was determined by performing an *in vitro* culture where MOG-specific CD8 T-cells were cultured with WT or MHC Ia deficient APC.

# Figure S4

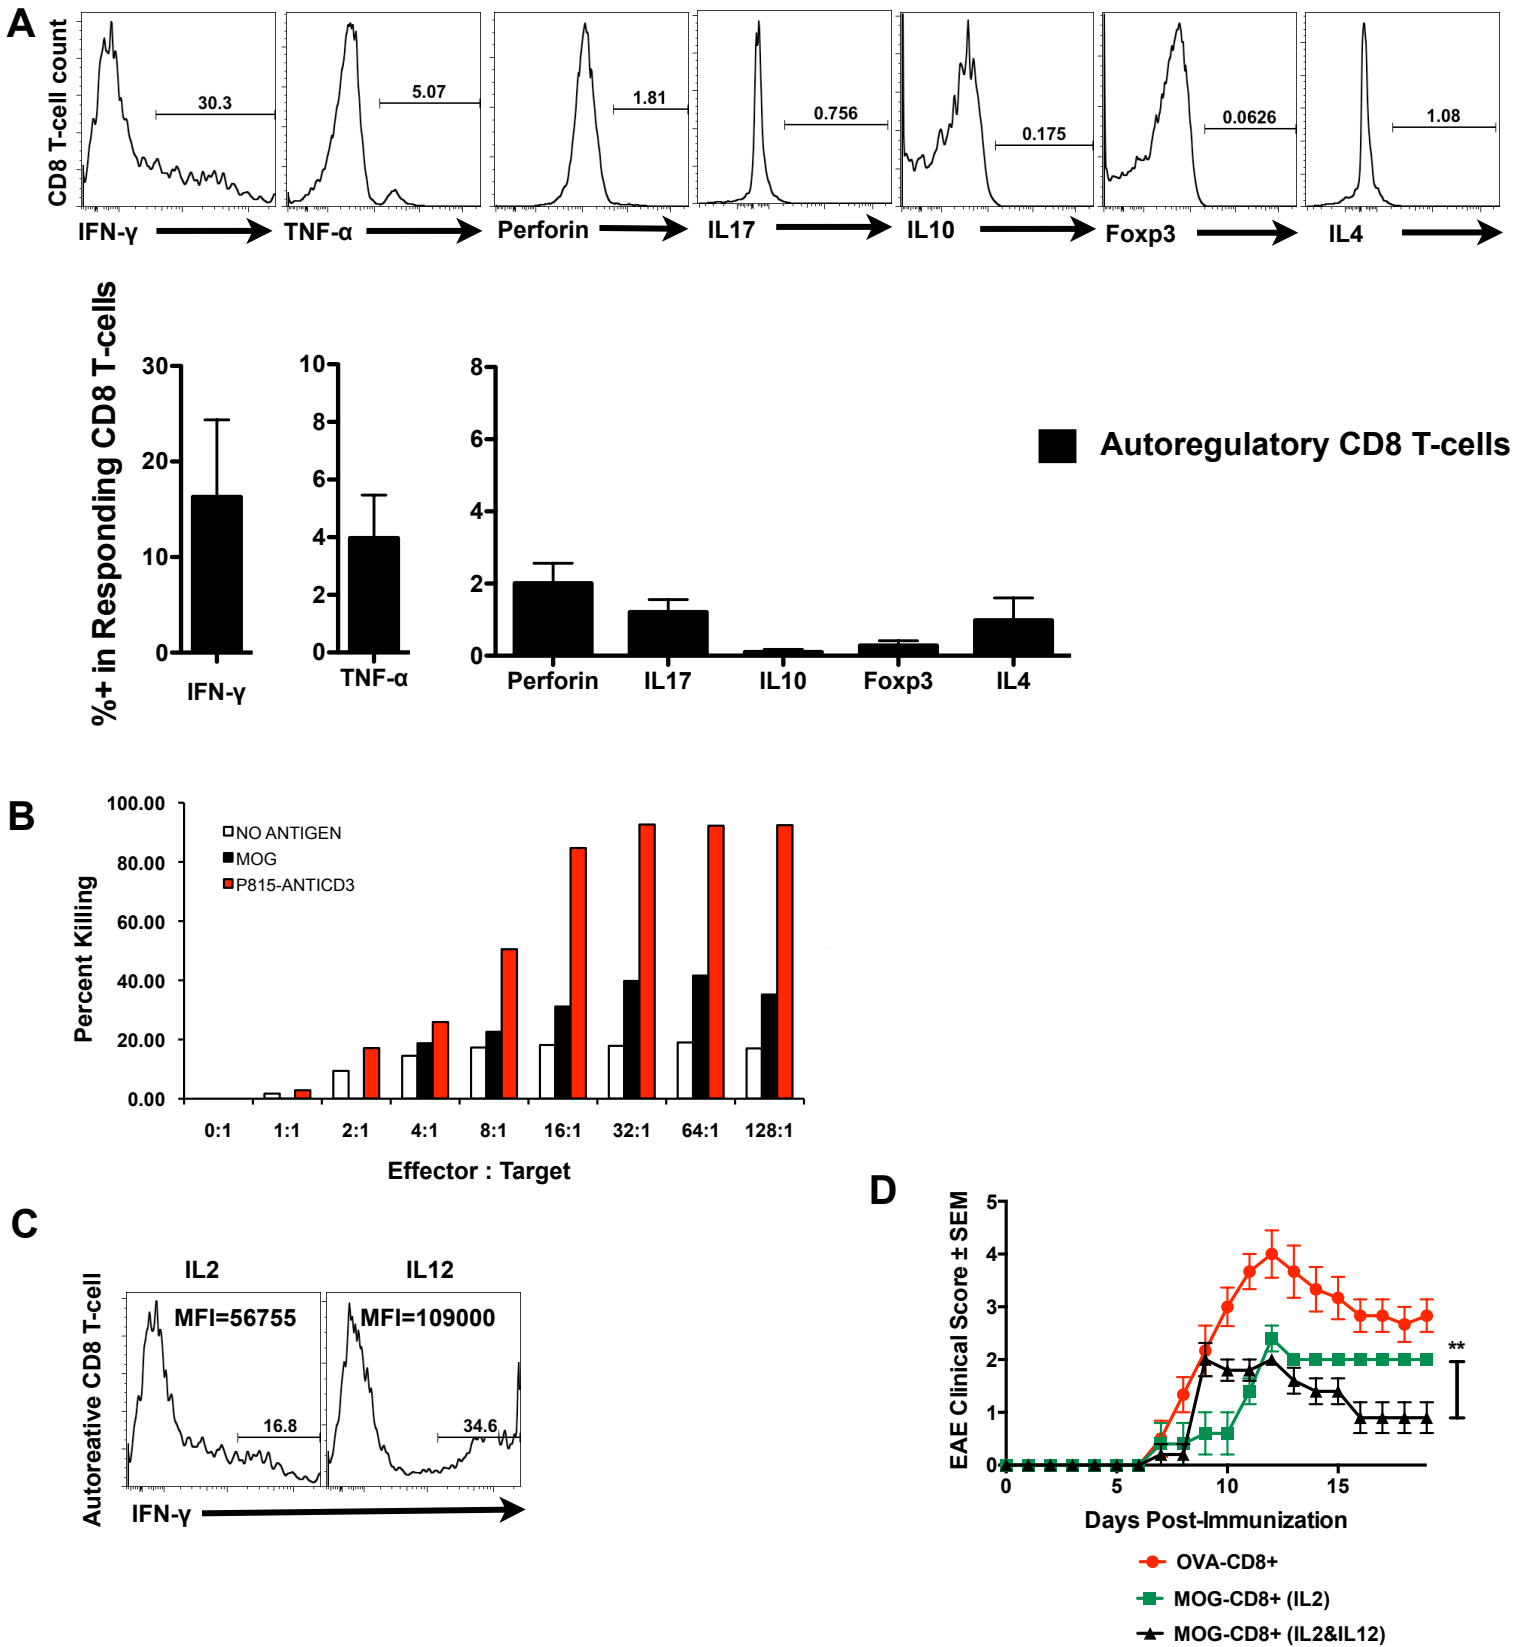

**Figure S4. Functional profile of autoregulatory CD8 T-cells.** (A) Intracellular cytokine stain of MOG-specific (i.e., proliferating/CFSE Low) TCR $\beta$ +CD4-CD8+ T-cells. Representative histogram and cumulative graph of five independent experiments. (B) *In vitro* cytotoxicity assay is shown where MOG-loaded, splenic ConA blasts were co-cultured with increasing numbers of MOG-specific CD8 T-cells. Anti-CD3-decorated P815 target cells were used as positive controls. Percent killing was defined as live CFSE target cells for a particular ratio divided by live CFSE target cells in the no effector condition. (C) Intracellular cytokine stain of MOG-specific (i.e. proliferating /CFSE Low) TCR $\beta$ +CD4-CD8+ T-cells following IL2 modulation. Interval numbers indicate the percentage of IFN- $\gamma$ + CD8 T-cells within the responding population. Mean fluorescence intensity (MFI) within the IFN- $\gamma$ + population is shown. (D) Clinical disease severity comparison between control, standard and IL2 modulated MOG-specific CD8 T-cells is shown. Representative of three independent experiments (5-7 mice per condition).
